# Supplementary material for: Construction and Application of EGCG-Loaded Lysozyme/Pectin Nanoparticles for Enhancing the Resistance of Nematodes to Heat and Oxidation Stresses
Source: MDPI journal article supplement (doi:10.3390/foods10051127), 2021-05-19
Supplement: s1 [file s1]

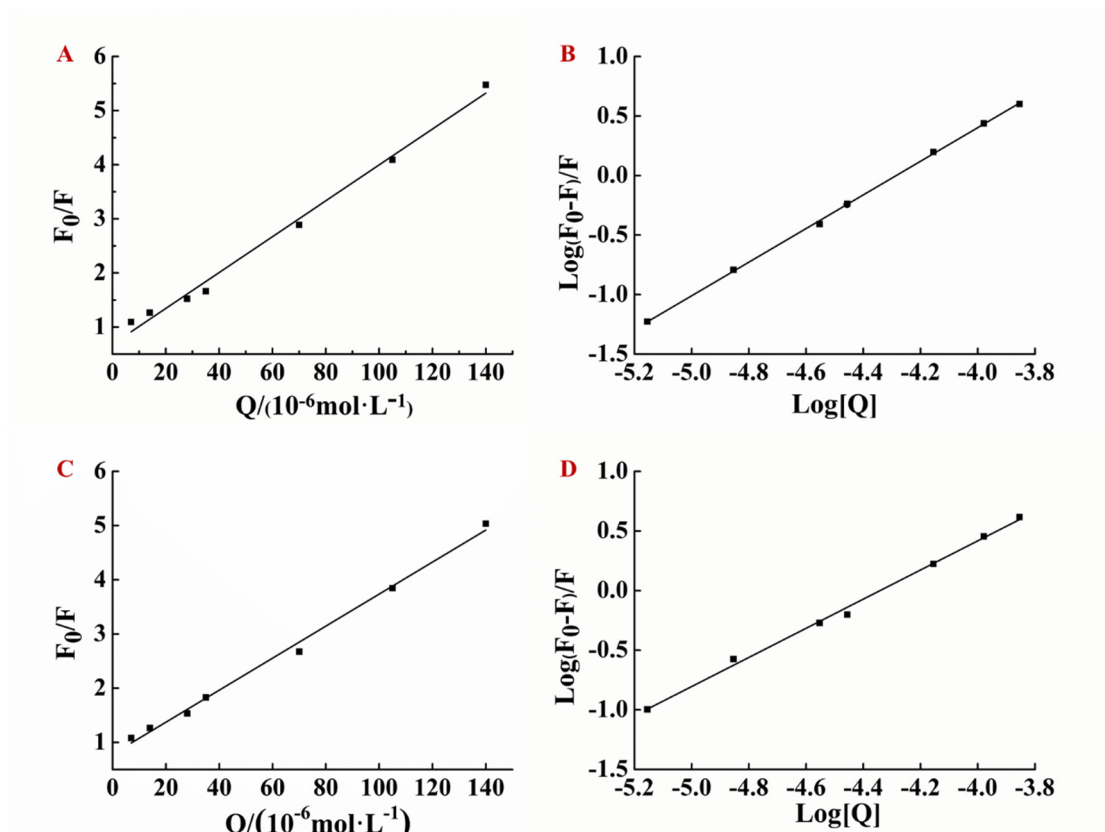

**Figure S1.** Linear plot of  $F_0/F$  versus [EGCG] and linear plot of  $\log(F_0 - F)/F$  versus  $\log [EGCG]$  (A, B) at 25 °C and (C, D) at 35 °C.

**Table S1.** Secondary structure fractions of EGCG-lysozyme/pectin nanoparticles at pH 7.0.

| <b>EGCG/Protein Ratio</b> | <b>0:1</b> | <b>1:1</b> | <b>2:1</b> | <b>4:1</b> |
|---------------------------|------------|------------|------------|------------|
| $\alpha$ -helix (%)       | 21.0       | 23.4       | 29.3       | 34.5       |
| $\beta$ -sheet (%)        | 46.7       | 38.1       | 31.5       | 21.7       |
| $\beta$ -turn (%)         | 3.0        | 7.4        | 11.8       | 14.1       |
| Random coil (%)           | 29.3       | 31.1       | 27.4       | 29.7       |

**Table S2.** Effect of EGCG/lysozyme molar ratio on  $\zeta$ -potential and PDI of lysozyme/pectin nanoparticles on after 0 h storage at room temperature.

| <b>Molar Ratio</b><br><b>(EGCG: Protein)</b> | <b>LY: Ps = 1:1 NPs</b>                  |                  |
|----------------------------------------------|------------------------------------------|------------------|
|                                              | <b><math>\zeta</math>-Potential (mV)</b> | <b>PDI</b>       |
| 0:1                                          | $-34.8 \pm 0.04$                         | $0.125 \pm 0.01$ |
| 1:1                                          | $-28.5 \pm 1.42$                         | $0.254 \pm 1.28$ |
| 2:1                                          | $-36.3 \pm 0.12$                         | $0.141 \pm 0.01$ |
| 4:1                                          | $-35.7 \pm 0.02$                         | $0.138 \pm 0.01$ |
| 8:1                                          | $-35.5 \pm 0.02$                         | $0.142 \pm 0.01$ |
| 16:1                                         | $-36.1 \pm 0.02$                         | $0.178 \pm 0.02$ |
| 32:1                                         | $-35.8 \pm 1.39$                         | $0.189 \pm 1.56$ |
| 64:1                                         | $-35.1 \pm 0.11$                         | $0.135 \pm 0.01$ |
| 128:1                                        | $-34.3 \pm 1.87$                         | $0.133 \pm 2.12$ |

**Table S3.** Effect of EGCG/lysozyme molar ratio on  $\zeta$ -potential and PDI of lysozyme/pectin nanoparticles after 24 h storage at room temperature.

| <b>Molar Ratio</b><br><b>(EGCG: Protein)</b> | <b>LY: Ps = 1:1 NPs</b>                  |                  |
|----------------------------------------------|------------------------------------------|------------------|
|                                              | <b><math>\zeta</math>-Potential (mV)</b> | <b>PDI</b>       |
| 0:1                                          | $-32.8 \pm 0.02$                         | $0.141 \pm 0.02$ |
| 1:1                                          | $-24.5 \pm 1.51$                         | $0.377 \pm 1.51$ |
| 2:1                                          | $-37.8 \pm 0.04$                         | $0.153 \pm 0.01$ |
| 4:1                                          | $-36.2 \pm 0.02$                         | $0.156 \pm 0.02$ |
| 8:1                                          | $-38.5 \pm 0.02$                         | $0.152 \pm 0.01$ |
| 16:1                                         | $-35.7 \pm 0.04$                         | $0.190 \pm 0.15$ |
| 32:1                                         | $-35.8 \pm 1.39$                         | $0.205 \pm 1.48$ |
| 64:1                                         | $-32.1 \pm 0.25$                         | $0.153 \pm 0.02$ |
| 128:1                                        | $-35.9 \pm 1.05$                         | $0.155 \pm 2.51$ |
